# Supplementary material for: Silicon and Aluminum Mobility in Soils of Jeju Island, Korea
Source: Hindawi journal article supplement (doi:10.1155/2020/3905813), 2020-10-10
Supplement: f1 [file 3905813.f1.docx]

**Supplementary Materials**

**Silicon and aluminum mobility in soils of Jeju Island, Korea**

Won-Pyo Park1 and Bon-Jun Koo2

1 Major of Plant Resources and Environment, Jeju National University, Jeju 63243, Korea.
2 2Department of Biological Sciences, California Baptist University, Riverside, CA 92504-3297, USA.

Correspondence should be addressed to Bon-Jun Koo; bonjunkoo@calbaptist.edu

**Table S1.** The content of elements on the fine earth fractions (2 mm) of soil samples and basaltic bedrocks.

| Horizon | depth | SiO2 | TiO2 | Al2O3 | Fe2O3 | MnO | MgO | CaO | Na2O | K2O | P2O5 | LOI | Nb | Zr | SiO2/Al2O3 | |
| --- | --- | --- | --- | --- | --- | --- | --- | --- | --- | --- | --- | --- | --- | --- | --- | --- |
|  | (cm) | (wt.%) |  |  |  |  |  |  |  |  |  |  | mg kg-1 |  | molar ratio | |
| Pyeongdae | | | | | | | | | | | | | | | |
| A | 0-18 | 28.4 | 2.27 | 21.9 | 12.9 | 0.17 | 1.37 | 0.51 | 0.51 | 0.73 | 0.44 | 30.2 | 65.8 | 255 | 2.19 | |
| AB | 18-44 | 31.5 | 2.94 | 22.1 | 17.2 | 0.17 | 2.32 | 0.57 | 0.52 | 0.82 | 0.39 | 21.1 | 71.1 | 286 | 2.41 | |
| Bw1 | 44-73 | 34.4 | 2.73 | 23.9 | 15.5 | 0.18 | 3.10 | 0.53 | 0.59 | 0.77 | 0.30 | 17.5 | 71.5 | 273 | 2.44 | |
| Bw2 | 73-100 | 33.0 | 3.08 | 26.5 | 16.8 | 0.20 | 3.40 | 0.61 | 0.48 | 0.64 | 0.34 | 14.8 | 80.9 | 321 | 2.12 | |
| BC | 100-140 | 33.3 | 3.32 | 28.1 | 18.7 | 0.22 | 3.93 | 0.71 | 0.53 | 0.56 | 0.49 | 10.5 | 84.5 | 345 | 2.01 | |
| Bedrock |  | 48.4 | 2.27 | 15.1 | 14.5 | 0.16 | 7.76 | 6.67 | 2.80 | 0.56 | 0.25 | 1.59 | 32.6 | 136 | 5.44 | |
| Namwon | | | | | | | | | | | | | | | |
| A | 0-26 | 37.7 | 1.65 | 16.6 | 9.52 | 0.15 | 1.24 | 0.62 | 0.73 | 0.93 | 0.50 | 29.9 | 58.6 | 171 | 3.86 | |
| A2 | 26-47 | 39.4 | 1.96 | 18.3 | 10.5 | 0.15 | 1.27 | 0.53 | 0.88 | 1.35 | 0.45 | 25.6 | 52.0 | 191 | 3.66 | |
| AB | 47-72 | 39.7 | 2.11 | 19.2 | 10.8 | 0.14 | 1.33 | 0.59 | 0.91 | 1.47 | 0.38 | 24.3 | 50.3 | 207 | 3.51 | |
| Bw | 72-160 | 41.0 | 2.27 | 23.9 | 13.0 | 0.14 | 2.21 | 0.42 | 0.56 | 1.24 | 0.22 | 14.4 | 61.5 | 259 | 2.91 | |
| Bedrock |  | 45.0 | 2.93 | 17.9 | 14.7 | 0.17 | 5.77 | 6.95 | 3.31 | 0.56 | 0.59 | 2.27 | 64.5 | 213 | 4.26 | |
| Jeju | | | | | | | | | | | | | | | |
| Ap | 0-20 | 59.4 | 1.37 | 17.7 | 7.01 | 0.05 | 1.36 | 0.47 | 0.89 | 1.19 | 0.09 | 10.0 | 47.3 | 169 | 5.69 | |
| AB | 20-41 | 62.1 | 1.44 | 16.9 | 7.17 | 0.09 | 1.54 | 0.46 | 0.88 | 1.19 | 0.07 | 7.28 | 47.8 | 192 | 6.23 | |
| Bt1 | 41-65 | 63.2 | 1.47 | 17.4 | 8.18 | 0.11 | 1.89 | 0.40 | 0.82 | 1.24 | 0.05 | 5.07 | 47.3 | 218 | 6.16 | |
| Bt2 | 65-92 | 63.8 | 1.48 | 17.9 | 7.35 | 0.09 | 1.98 | 0.47 | 0.93 | 1.26 | 0.05 | 5.58 | 50.3 | 220 | 6.07 | |
| Bt3 | 92-150 | 64.3 | 1.35 | 17.6 | 7.37 | 0.09 | 1.66 | 0.36 | 0.78 | 1.28 | 0.06 | 5.62 | 49.5 | 197 | 6.21 | |
| Bedrock |  | 45.7 | 2.68 | 20.0 | 13.9 | 0.15 | 3.79 | 6.49 | 3.47 | 0.51 | 0.66 | 2.66 | 70.1 | 269 | 3.88 | |
| Gangjeong | | | | | | | | | | | | | | | |
| Ap | 0-24 | 60.6 | 1.57 | 16.2 | 7.78 | 0.12 | 1.66 | 0.74 | 0.88 | 1.25 | 0.18 | 8.02 | 46.9 | 197 | 6.36 | |
| BAt | 24-38 | 63.3 | 1.25 | 16.9 | 7.35 | 0.06 | 2.02 | 0.52 | 0.99 | 1.68 | 0.10 | 5.66 | 41.3 | 150 | 6.35 | |
| Bt1 | 38-53 | 66.8 | 1.25 | 16.8 | 6.31 | 0.05 | 1.41 | 0.44 | 1.16 | 1.89 | 0.10 | 4.63 | 39.4 | 154 | 6.75 | |
| Bt2 | 53-85 | 66.3 | 1.32 | 16.6 | 7.06 | 0.08 | 1.56 | 0.41 | 1.21 | 1.90 | 0.12 | 4.42 | 42.6 | 165 | 6.78 | |
| Bt3 | 85-135 | 66.2 | 1.32 | 16.7 | 6.49 | 0.12 | 1.43 | 0.48 | 1.59 | 1.97 | 0.16 | 4.41 | 42.1 | 171 | 6.74 | |
| Bedrock |  | 45.1 | 2.63 | 16.3 | 14.9 | 0.16 | 7.54 | 6.44 | 2.69 | 0.96 | 0.65 | 2.85 | 70.3 | 262 | 4.70 | |
